# Supplementary material
Source: HighWire-hosted journal article supplement (https://jnm.snmjournals.org/highwire/filestream/94936/field_highwire_adjunct_files/0/173104_Supplemental_Data.pdf)

**SUPPLEMENTAL FIGURE 1.** Experimental determination of recovery coefficients (RC) for both  $^{99m}\text{Tc}$  SPECT and  $^{90}\text{Y}$ -TOF PET. Activity (and thus dose) in TV and NTV were corrected by applying appropriate RC values according to the volume determined by linear interpolation between neighboring experimental RC values.

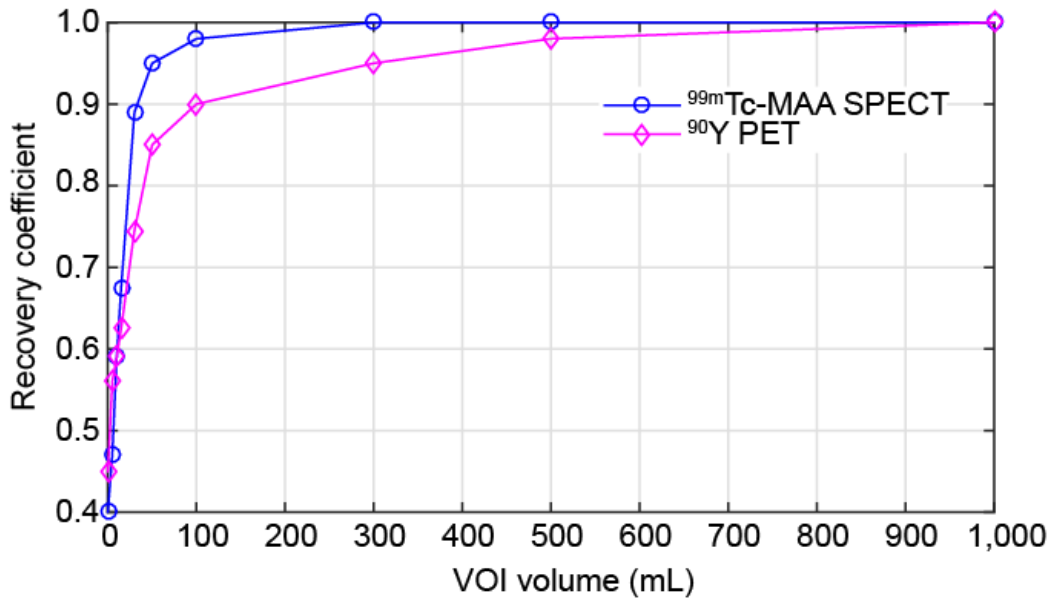

**SUPPLEMENTAL FIGURE 2.**  $^{99m}\text{Tc}$ -MAA SPECT (A) and  $^{90}\text{Y}$ -TOF PET (B) of a liver treated with glass microspheres. Treated volume is contoured in green and tumor in blue. Tumor DVH (C): the blue line corresponds to the  $^{90}\text{Y}$  dosimetry based on the  $^{99m}\text{Tc}$ -MAA SPECT spatial activity distribution; the red line refers to the posttreatment dosimetry based on the  $^{90}\text{Y}$ -TOF PET activity distribution.

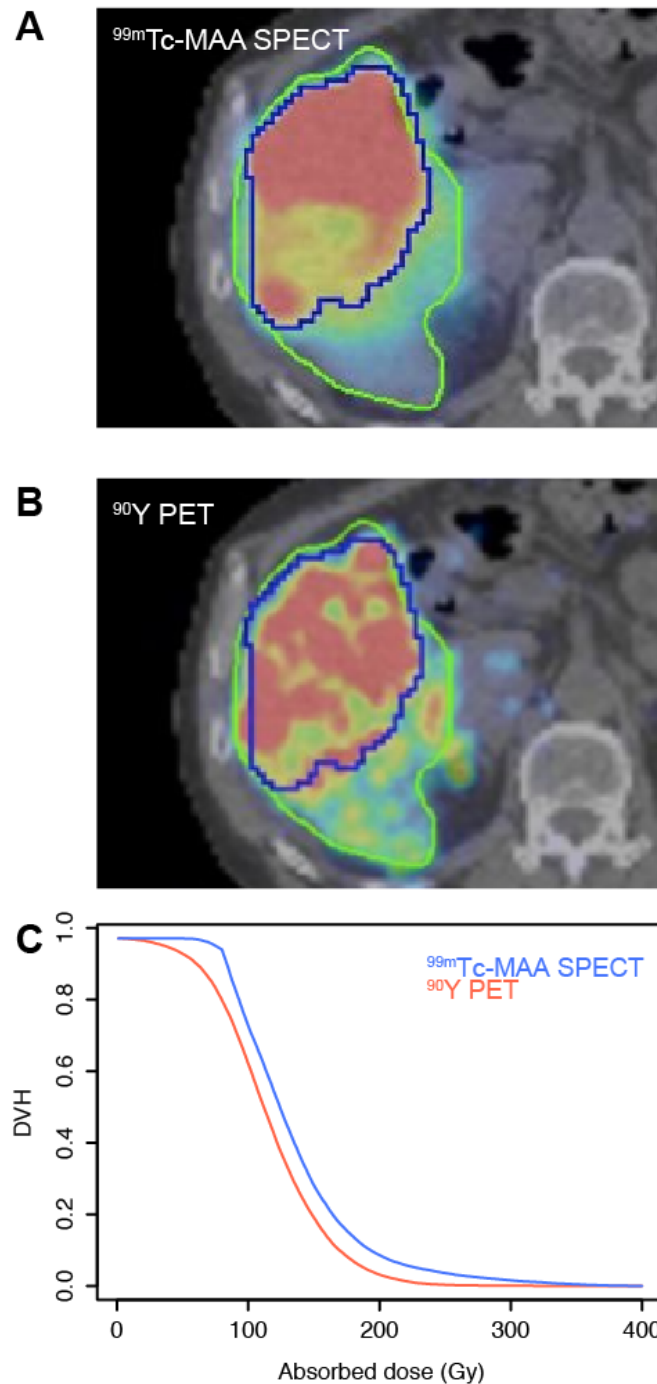

**SUPPLEMENTAL FIGURE 3.** Mean tumor dose ( $D_{mean}$ ) comparison between predictive  $^{90}\text{Y}$  dosimetry based on  $^{99\text{m}}\text{Tc}$ -MAA SPECT and posttreatment dosimetry based on  $^{90}\text{Y}$ -TOF PET for resin microspheres, tumor volumes  $\leq 150$  mL (A) and  $> 150$  mL (B). Red lines indicate linear regression fitted with least-squares method.

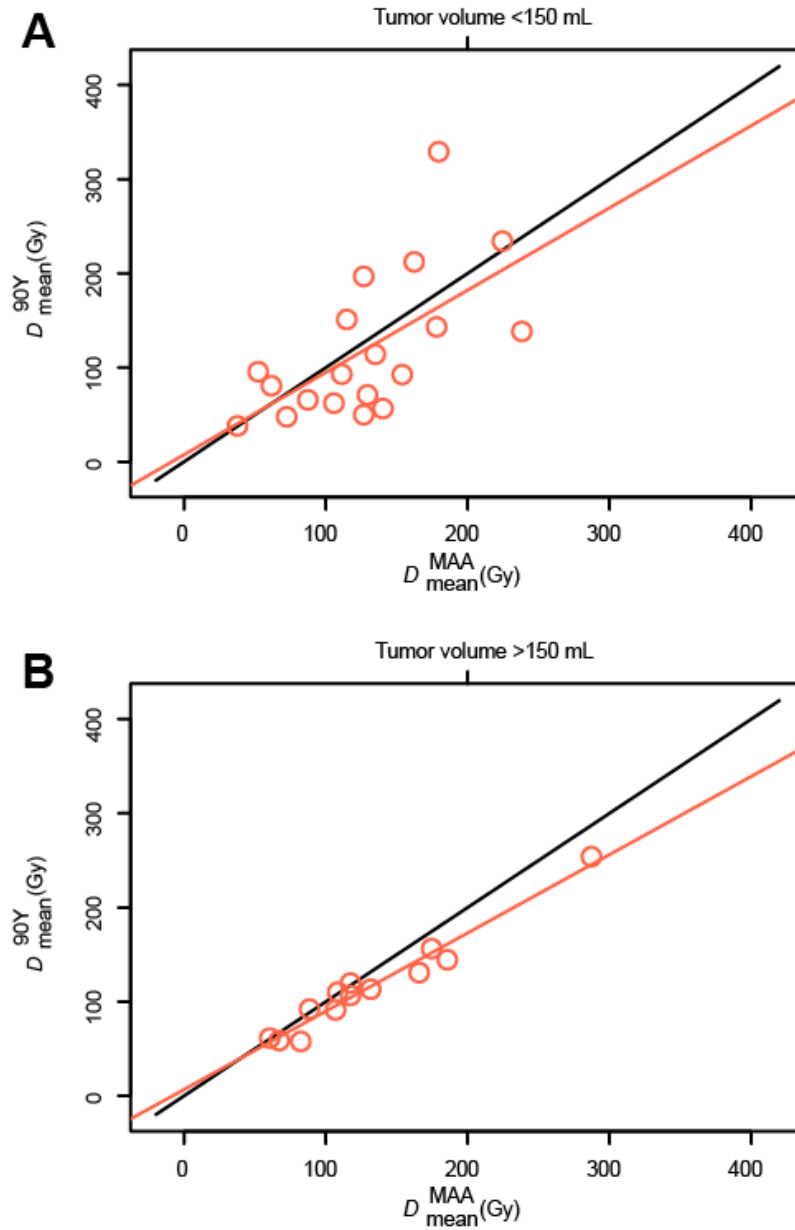

**SUPPLEMENTAL FIGURE 4.**  $DR^{TV}$  as a function of the TV/NTV ratio for glass microspheres (full red dots) and resin spheres (blue crosses) respectively.

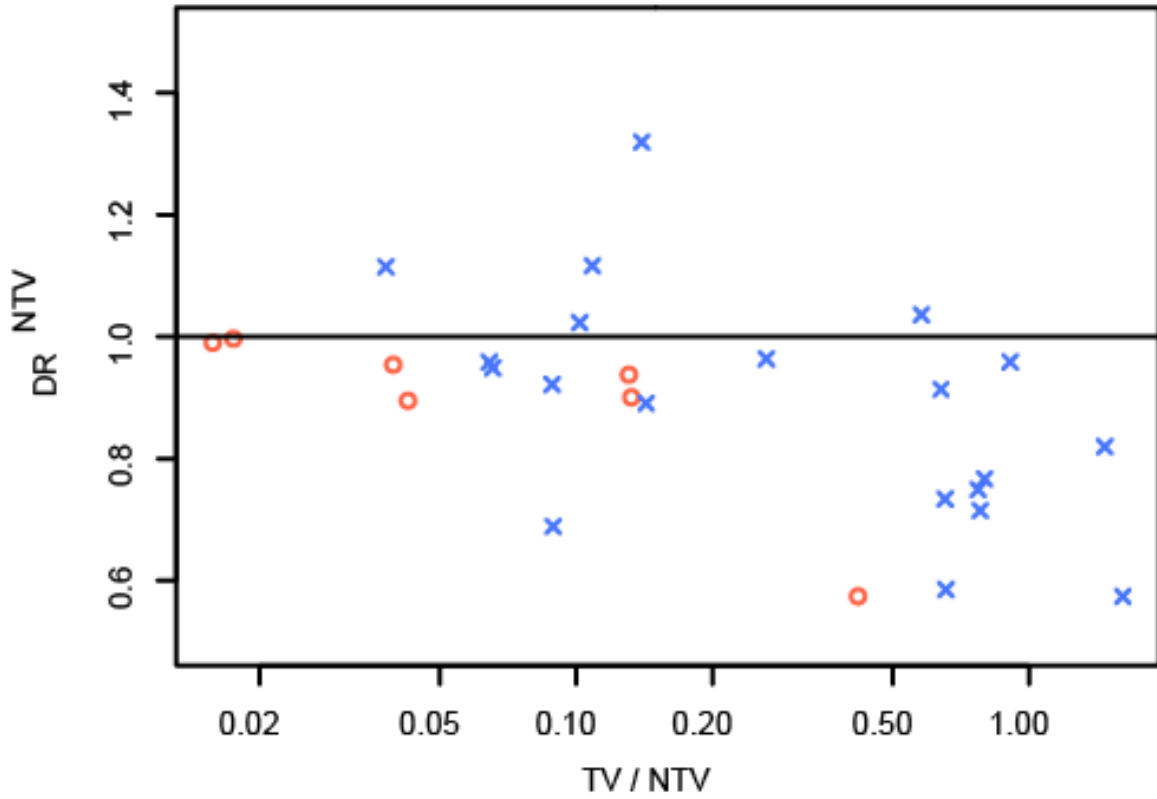

Supplement: 173104_Supplemental_Data.pdf [file 173104_Supplemental_Data.pdf]
